# Supplementary material for: Single-step pyrolytic preparation of Mo2C/graphitic carbon nanocomposite as catalyst carrier for the direct liquid-feed fuel cells
Source: Royal Society of Chemistry journal article supplement (doi:10.1039/c3ra23391j), 2013-01-01
Supplement: c3ra23391j.pdf [file c3ra23391j.pdf]

## Supporting Information

### Single-step pyrolytic preparation of Mo<sub>2</sub>C/Graphitic carbon nanocomposite as catalyst carrier for the direct liquid-feed fuel cells

Ruihong Wang,<sup>a</sup> Jun Yang,<sup>a</sup> Keying Shi,<sup>a</sup> Bo Wang,<sup>a</sup> Lei Wang,<sup>a</sup> Guohui Tian,<sup>a</sup> Buhe Bateer,<sup>a</sup>  
Chungui Tian,<sup>a</sup> Peikang Shen<sup>\*b</sup> and Honggang Fu<sup>\*a</sup>

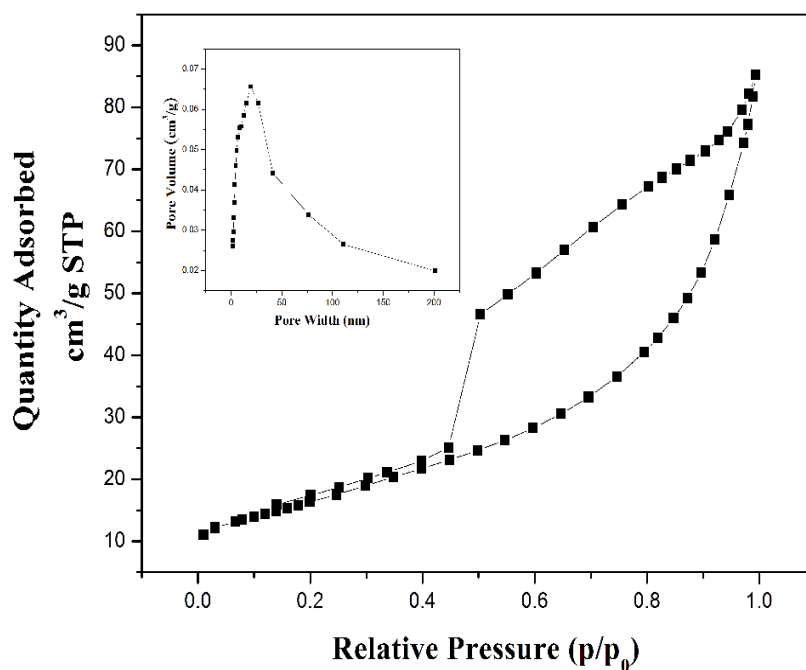

**Fig. S1** N<sub>2</sub> adsorption/desorption isotherm of Mo<sub>2</sub>C/GC and the inset indicates pore-size distribution obtained by the BJH method.

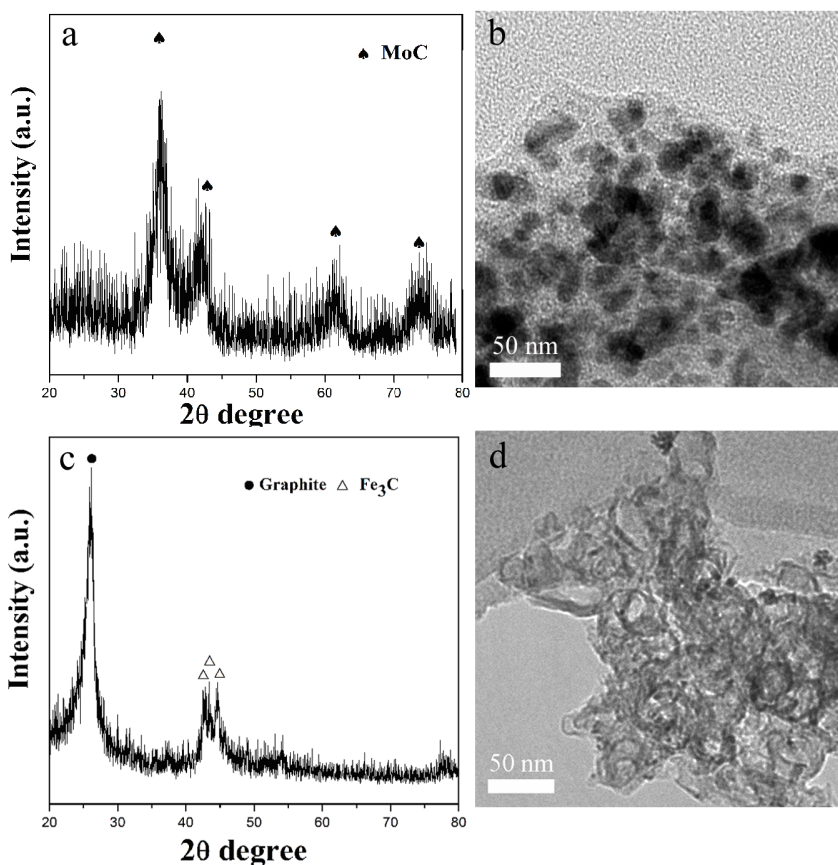

Fig. S2 XRD pattern (a) and TEM image of MoC/AC (b), XRD pattern (c) and TEM image of GC (d)

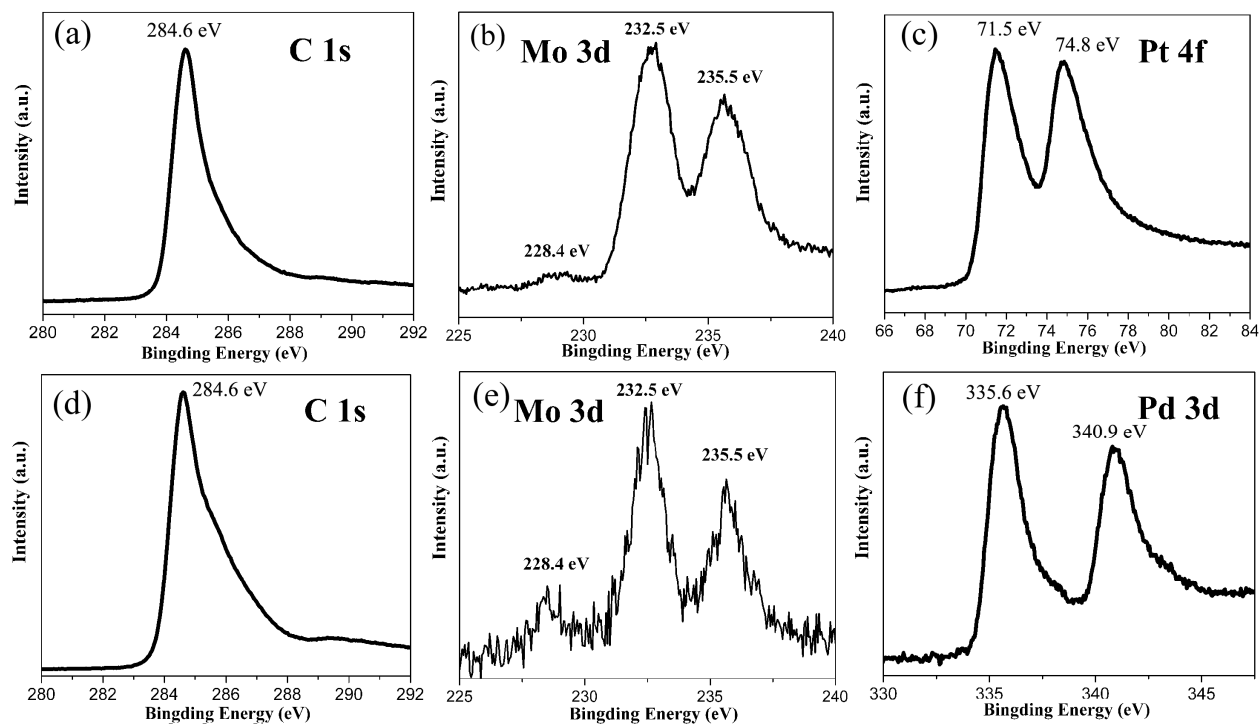

Fig. S3 XPS spectra of the (a) C 1s, (b) Mo 3d, (c) Pt 4f of Pt-Mo<sub>2</sub>C/GC and (d) C 1s, (e) Mo 3d, (f) Pd 3d of Pd-Mo<sub>2</sub>C/GC.

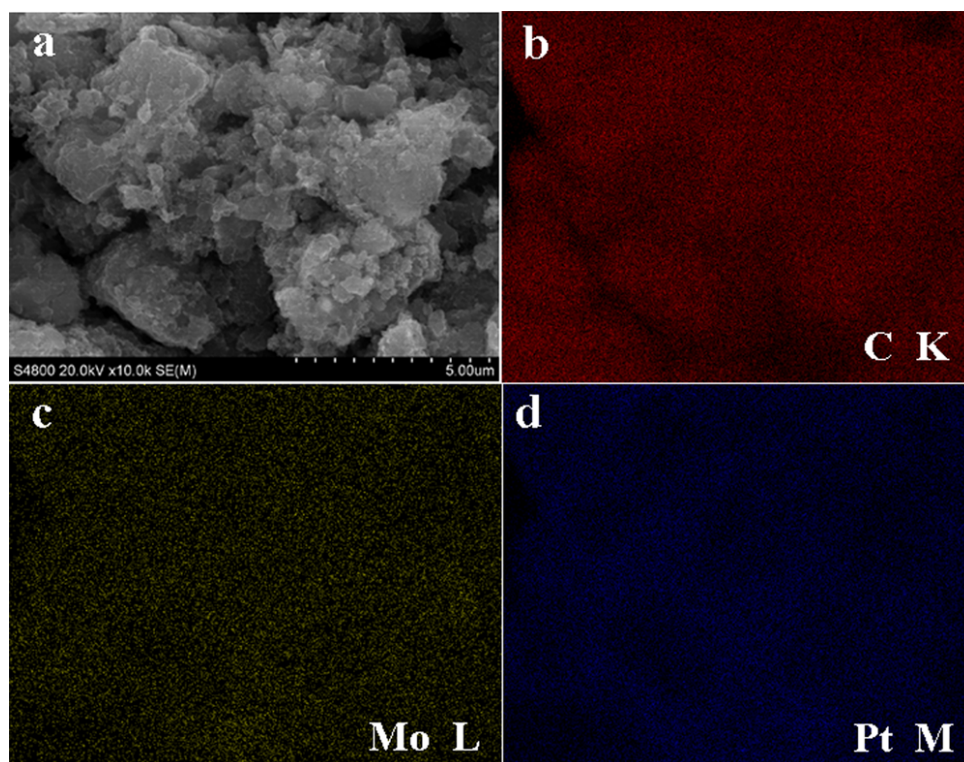

**Fig. S4** (a) SEM image of Pt-Mo<sub>2</sub>C/GC, (b) SEM-EDS mapping analysis of C-element, (c) Mo-element and (d) Pt-element in Pt-Mo<sub>2</sub>C/GC

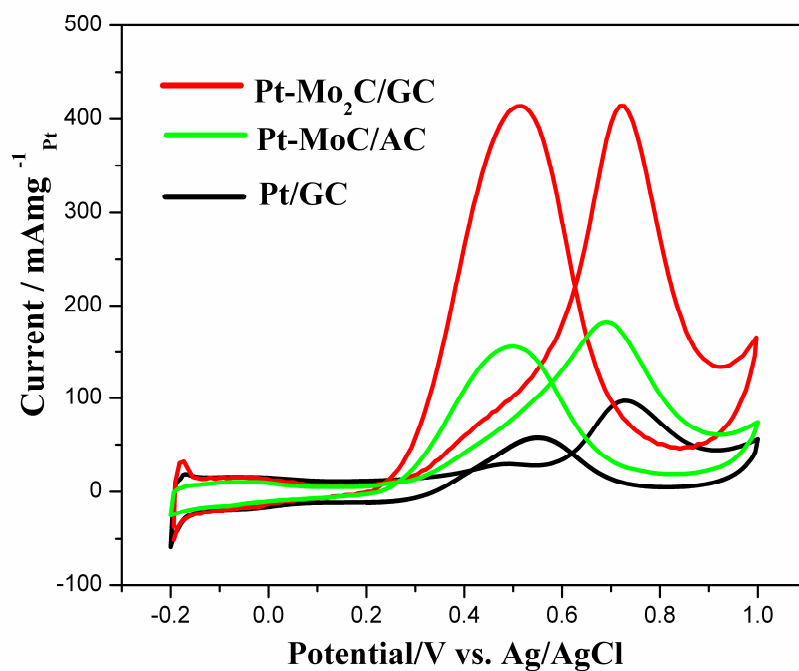

**Fig. S5** Methanol electro-oxidation curves for catalysts recorded in a 1.0 M H<sub>2</sub>SO<sub>4</sub> + 1.0 M CH<sub>3</sub>OH solution with a sweep rate of 50 mV/s.

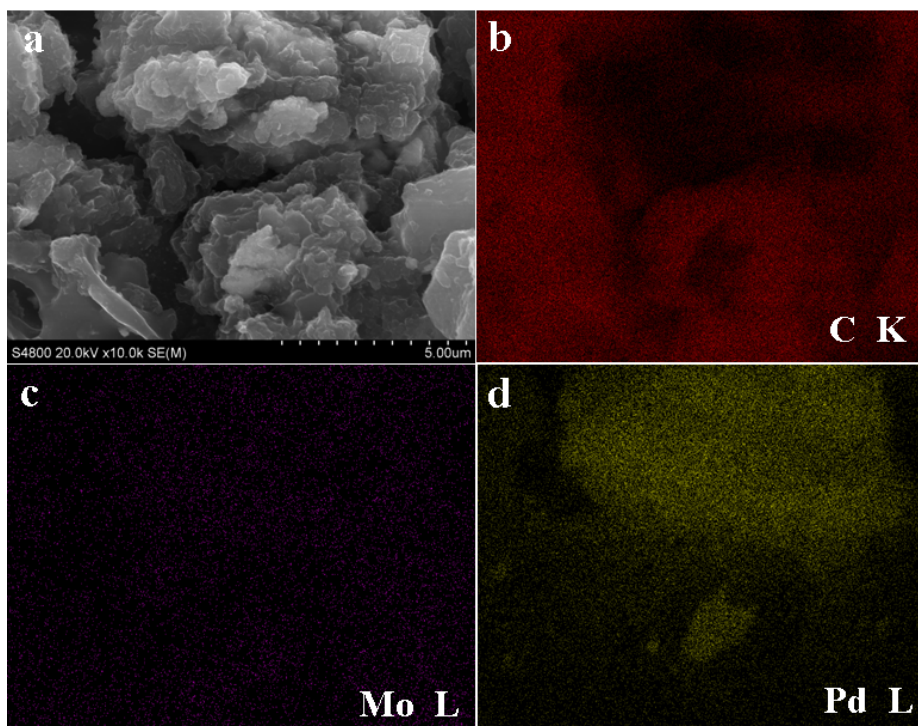

**Fig. S6** (a) SEM image of Pd-Mo<sub>2</sub>C/GC, (b) SEM-EDS mapping analysis of C-element, (c) Mo-element and (d) Pd-element in Pd-Mo<sub>2</sub>C/GC
